# Supplementary material for: Toxic, Radical Scavenging, and Antifungal Activity of Rhododendron tomentosum H. Essential Oils
Source: MDPI journal article supplement (doi:10.3390/molecules25071676), 2020-04-05
Supplement: s1 [file s1]

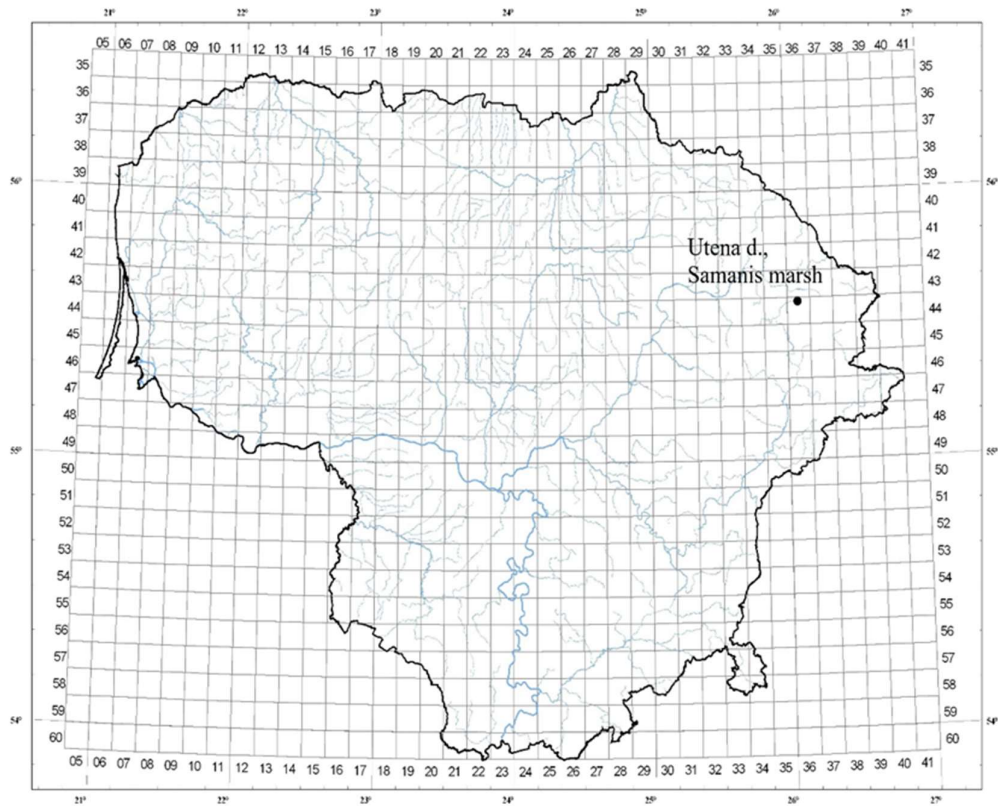

**Figure S1.** Geographical indication of *Rh. tomentosum* sampling site in Eastern Lithuania (Utena district).

**Table S1.** Summary of studies on bioactivities of *Rh. tomentosum* Harmaja (ex *Ledum palustre* L.) extracts, essential oils or emitted volatiles.

| Activity, Evaluation Method                                                                                                                                                     | Product, Main Composition                                                                                                                                       | Results                                                                                                                                                                                                                                                  |
|---------------------------------------------------------------------------------------------------------------------------------------------------------------------------------|-----------------------------------------------------------------------------------------------------------------------------------------------------------------|----------------------------------------------------------------------------------------------------------------------------------------------------------------------------------------------------------------------------------------------------------|
| <b>Repellent</b> against host-seeking nymphs of <i>Ixodes ricinus</i> Linnaeus (Acari: Ixodidae) [1]                                                                            | Extracts in solvents of different polarities and leaf EOs by steam distillation; myrcene, palustrol                                                             | EO diluted in acetone (10%) exhibited 95% repellency; extracts in ethyl acetate have shown >70% repellence activity. <i>I. ricinus</i> were deterred from feeding when 10% of EO was introduced.                                                         |
| <b>Repellent</b> against mosquitoes <i>Aedes aegypti</i> (L.) probing on treated cloth [2]                                                                                      | Extracts in solvents of different polarities, by steam distillation and SPME. Extract of leaf EO in ethyl acetate, <i>p</i> -cymene, sabinene, terpinyl acetate | Extracts significantly reduced activity of <i>Aedes aegypti</i> (L.): 83.5% repellency (0.5 ml plant extract).                                                                                                                                           |
| <b>Insect growth regulating and toxic</b> effects on the metamorphosis stages of <i>Tenebrio molitor</i> (Coleoptera, Tenebrionidae), differential thermocouple calorimetry [3] | Leaves and flowers, extracts in 80% of EtOH (composition not indicated)                                                                                         | Non-lethal mild toxic effects of extracts. The timing of normal and failed ecdysis (after treatment with <i>L. palustre</i> ), the length of intercdysial periods in <i>T. molitor</i> pupae, respiratory and muscular responses of poisoned insects was |

|                                                                                                                                                                                                                                                                                                                   |                                                                                                                                               |                                                                                                                                                                                                                                                                                                                                                                                                                                                                                                                                                           |
|-------------------------------------------------------------------------------------------------------------------------------------------------------------------------------------------------------------------------------------------------------------------------------------------------------------------|-----------------------------------------------------------------------------------------------------------------------------------------------|-----------------------------------------------------------------------------------------------------------------------------------------------------------------------------------------------------------------------------------------------------------------------------------------------------------------------------------------------------------------------------------------------------------------------------------------------------------------------------------------------------------------------------------------------------------|
|                                                                                                                                                                                                                                                                                                                   |                                                                                                                                               | measured. The treated pharate pupae transformed into extra-pupal instars, which is a symptom of juvenilizing effect.                                                                                                                                                                                                                                                                                                                                                                                                                                      |
| <b>Repellent and antifeedant</b> effects against <i>Hylobius abietis</i> L. and <i>Phylloocta laticollis</i> Suffrian, olfactometry tests [4]                                                                                                                                                                     | Fresh leaves, extracts in different organic solvents: ethyl acetate, MeOH and hexane; palustrol, ledol, $\beta$ -myrcene                      | Feeding by the adults and larvae of <i>P. laticollis</i> and <i>H. abietis</i> was significantly reduced by methanol and hexane extracts.<br>Concomitant with less feeding, larval growth was retarded by ethyl acetate extract of the plant                                                                                                                                                                                                                                                                                                              |
| <b>Repellence:</b> system <i>Brassica oleracea</i> var. <i>italica</i> (broccoli)– <i>Plutella xylostella</i> (crucifer specialist herbivore) – <i>Cotesia vestalis</i> (endoparasitoid of <i>P. xylostella</i> ) is influenced by exposure to the natural semi-volatiles emitter plant <i>Rh. tomentosum</i> [5] | Semi-volatiles emitted from branches, main composition of emissions: palustrol (43%), $\beta$ -myrcene (34%), aromadendrene (10%), ledol (9%) | <i>Rh. tomentosum</i> -exposed <i>B. oleracea</i> was less susceptible to <i>P. xylostella</i> oviposition at both night-time (12°C) and day-time (22°C) temperatures and less favoured and damaged by <i>P. xylostella</i> larvae at 12°C. Exposure did not interfere with indirect defence, i.e., attraction of the natural enemy <i>C. vestalis</i> on host-damaged, <i>R. tomentosum</i> -exposed <i>B. oleracea</i> under 22°C, while there was a reduction in attraction (marginal preference towards host-damaged <i>B. oleracea</i> ) under 12°C. |
| Biological tests on growth of <i>Lemna minor</i> L., and $\alpha$ -amylase activity in wheat seeds and coleoptile sections from 3-day-etiolated wheat sprouts [6]                                                                                                                                                 | Leaves and young shoots, EO adsorbed on natural zeolite                                                                                       | Volatile compounds completely inhibited the growth processes of the biotest used.                                                                                                                                                                                                                                                                                                                                                                                                                                                                         |
| <b>Analgetic, Anti-inflammatory</b> [7]                                                                                                                                                                                                                                                                           | EO, aqueous and MeOH extracts (flavonoid components)                                                                                          | Analgesic test: methanol extract (10.0 and 1.0mg/kg) and aqueous extract (10.0mg/kg) decreased the acetic acid-induced writhing response.<br>Anti-inflammatory test: MeOH extract (10.0 and 1.0mg/kg) and aqueous extract (10.0 mg/kg) decreased the paw edema in 2, 3, 4, 5 and 6 hours after lambda-carrageenan administration.                                                                                                                                                                                                                         |
| <b>Antibacterial</b> <i>in vitro</i> , broth dilution method, against <i>S. aureus</i> , <i>E. coli</i> , <i>P. aeruginosa</i> , <i>K. pneumoniae</i> [8]<br><b>Anti-inflammatory</b> <i>in vivo</i> , carrageenan-induced edema in rats [8]                                                                      | Shoots, aqueous extract and isolated polysaccharide complex<br>Shoots, dry aqueous extract, 40 and 70% in EtOH                                | Bacteriostatic effect at 1/160 dilution, excluding to <i>P. aeruginosa</i> (1/20 dilution) for polysaccharide complex.<br>51.5±4.6% Inhibition of edema by 40% EtOH extract, comparable to butadiene.                                                                                                                                                                                                                                                                                                                                                     |
| <b>Anticancer</b> <i>in vitro</i> , mouse leukemia cells L1210 [9]                                                                                                                                                                                                                                                | Aerial part, methylene chloride and MeOH extracts, Soxhlet                                                                                    | 99% growth inhibition by methylene chloride extract, 71% growth inhibition by MeOH extract.                                                                                                                                                                                                                                                                                                                                                                                                                                                               |

|                                                                                                                                                                                                                                                                         |                                                                                                                                                         |                                                                                                                                                                                                                                                                                                                                                                             |
|-------------------------------------------------------------------------------------------------------------------------------------------------------------------------------------------------------------------------------------------------------------------------|---------------------------------------------------------------------------------------------------------------------------------------------------------|-----------------------------------------------------------------------------------------------------------------------------------------------------------------------------------------------------------------------------------------------------------------------------------------------------------------------------------------------------------------------------|
| <b>Anticancer</b> <i>in vitro</i> , human lympho-blastoid Raji cells [10]                                                                                                                                                                                               | Aerial parts, crude EtOH (40%) extract                                                                                                                  | 99% inhibition at 200µg/mL.                                                                                                                                                                                                                                                                                                                                                 |
| <b>Antidiabetic</b> <i>in vitro</i> , C2C12 murine skeletal myoblasts and the 3T3-L1 murine preadipocyte cell lines [11]<br><b>Antioxidant activity</b> <i>in vitro</i> , DPPH assay, ascorbic acid was used as the reference antioxidant [12]                          | Leaves, EtOH (80%) extract with 153.5 µg/mg total phenolic (chlorogenic acid, catechins, taxifolin, quercetin glycoside)                                | Cytoprotective properties under conditions of glucose toxicity (150mmol/L of glucose) and glucose deprivation (1.1mmol/L glucose) at 6.25µg/mL. Effect on the basal and insulin stimulated 3H-deoxy-glucose uptake in differentiated 3T3-L1 adipocytes at 50µg/mL. Triglyceride level was increased by 3-fold. Strong antioxidant activity, close to that of ascorbic acid. |
| <b>Antidiabetic</b> <i>in vitro</i> , Caco-2/15 cells; western blot analysis <i>in vivo</i> . Rats, oral glucose tolerance test [12]                                                                                                                                    | Leaves, EtOH (80%) extract with 153.5µg/mg total phenolic                                                                                               | Instantaneous inhibition of differentiated Caco2/15 intestinal cells glucose absorption at 100µg/mL. Reduction of SGLT1 protein expression, AUC of blood glucose levels <i>in vivo</i> .                                                                                                                                                                                    |
| <b>Antifungal</b> , against <i>A. niger</i> , <i>C. albicans</i> , <i>M. canis</i> , <i>T. rubrum</i> and <i>T. mentagrophytes</i> [13]                                                                                                                                 | EO                                                                                                                                                      | EO exhibited antifungal activities from mild to strong.                                                                                                                                                                                                                                                                                                                     |
| <b>Antifungal</b> <i>in vitro</i> , micro-broth dilution method, against <i>C. neoformans</i> , <i>S. cerevisiae</i> , <i>A. niger</i> , <i>C. albicans</i> [14]                                                                                                        | Leaves, quercetin 3-β-D-(6- <i>p</i> -coumaroyl) galactoside and quercetin 3-β-D-(6- <i>p</i> -hydroxy-benzoyl)                                         | MIC 16-63µg/mL for <i>C. neoformans</i> , <i>S. cerevisiae</i> and <i>A. niger</i> .<br>MIC 250µg/mL for <i>C. albicans</i> .<br>MIC 0.16-10µg/mL for amphotericin B and fluconazole.                                                                                                                                                                                       |
| <b>Anti-inflammatory</b> , subcutaneous carrageenan injection-induced hind paw oedema in rats [15].                                                                                                                                                                     | Aerial parts, EO by supercritical fluid extraction (SFE) and hydrodistillation (HD). Palustrol (41.0-43.4%), ledol (23.3-26.7%), ascaridole (4.5-15.1%) | EO enhanced a significant inhibition of oedema (50-73%) for HD oil and (52-80%) for SFE oil. These results were similar to those obtained with piroxicam (70%) and ketoprofen (55%).                                                                                                                                                                                        |
| <b>Anti-inflammatory</b> <i>in vitro</i> , prostaglandin-synthesizing cyclooxygenase system from sheep seminal vesicles [16]                                                                                                                                            | Aerial part, EO                                                                                                                                         | EO inhibited cyclooxygenase <i>in vitro</i> 46.6% and carvacrol was responsible for 94% inhibition. Ledol did not inhibit the enzyme.                                                                                                                                                                                                                                       |
| <b>Anti-inflammatory</b> <i>in vitro</i> , prostaglandin biosynthesis assay; PAF-induced exocytosis [17]                                                                                                                                                                | Aerial parts, aqueous extract, lyophilized                                                                                                              | Moderate inhibition of prostaglandin biosynthesis (50%) and platelet activating factor (PAF)-induced exocytosis (71%).                                                                                                                                                                                                                                                      |
| <b>Antimicrobial</b> <i>in vitro</i> , against <i>S. aureus</i> , <i>S. pneumoniae</i> , <i>C. perfringens</i> , <i>B. cereus</i> , <i>E. aerogenes</i> , <i>K. pneumoniae</i> , <i>C. albicans</i> , <i>M. smegmatis</i> , <i>A. lwoffii</i> and <i>C. krusei</i> [18] | EO and MeOH extracts, EO main composition: sabinene (17.8%), terpinen-4-ol (7.6%) and myrtenal (7.4%)                                                   | EO possessed antioxidant and low antimicrobial properties <i>in vitro</i> , while the water-insoluble parts of the methanolic extracts exhibited slight or no antimicrobial activity. EO strongly reduced DPPH* (IC <sub>50</sub> =1.56µg/ml) formation and exhibited a hydroxyl radical scavenging                                                                         |

|                                                                                                                                                                                                                    |                                                                                                                         |                                                                                                                                                                                                                                                                                                                                                                                                                               |
|--------------------------------------------------------------------------------------------------------------------------------------------------------------------------------------------------------------------|-------------------------------------------------------------------------------------------------------------------------|-------------------------------------------------------------------------------------------------------------------------------------------------------------------------------------------------------------------------------------------------------------------------------------------------------------------------------------------------------------------------------------------------------------------------------|
| <b>Antioxidant</b> <i>in vitro</i> , DPPH assay, Fe <sup>3+</sup> -EDTA-H <sub>2</sub> O <sub>2</sub> deoxyribose assay, nonenzymatic lipid peroxidation of rat liver homogenate [18]                              |                                                                                                                         | effect in the deoxyribose system (IC <sub>50</sub> = 2.7µg/ml), and inhibited the nonenzymatic lipid peroxidation of rat liver homogenate (IC <sub>50</sub> = 13.5µg/ml). The polar phase of the extract showed antioxidant activity.                                                                                                                                                                                         |
| <b>Antimicrobial</b> <i>in vitro</i> , against <i>Vibrio parahaemolyticus</i> [19]                                                                                                                                 | Aerial parts, EO: α-thujenal (22.5%), β-phellandrene (10.3%), benzene,1-methyl-3-(1-methylethyl) (6.6%)                 | EO at concentration 5g/L inhibited growth of <i>V. parahaemolyticus</i> obviously.                                                                                                                                                                                                                                                                                                                                            |
| <b>Anti-proliferative and pro-apoptotic</b> activity <i>in vitro</i> , the influence of EOs on blood lymphocytes' proliferation and apoptosis rates of synovia-derived cells was determined by flow cytometry [20] | Shoot EOs of γ-terpineol and palustrol/ledol chemotypes and microshoots cultivated <i>in vitro</i> of ledene oxide type | EOs had anti-proliferative and pro-apoptotic activity toward CD4 and CD8 T cells, synovia-infiltrating monocyte/macrophages and fibroblast-like synovial cells.<br>At 1:400 dilutions, all tested EOs increased the number of necrotic cells in synovial fibroblasts from RA synovia; and increased proportions of late apoptotic cells in leucocyte populations.                                                             |
| <b>Antithrombin</b> <i>in vitro</i> , thrombin solution from bovine plasma [21]                                                                                                                                    | Aerial parts, MeOH extract, Soxhlet                                                                                     | 88% of thrombin inhibition                                                                                                                                                                                                                                                                                                                                                                                                    |
| <b>Hepato-protective</b> <i>in vivo</i> , rats, mice, CCl <sub>4</sub> intoxication [22]                                                                                                                           | Shoots, dry extract (EtOH 40%)                                                                                          | Extract reduced hexobarbital sleeping time 1.4-and 3.2-fold, respectively, for rats and mice; and improved functional-metabolic and morphological parameters of liver.                                                                                                                                                                                                                                                        |
| <b>Toxicity</b> <i>in vivo</i> , tested on mice [23]                                                                                                                                                               | Shoots, 40% EtOH extract, chloroform and hexane fractions of EtOH extract                                               | LD <sub>50</sub> =2.800–3.200mg/kg for 40% EtOH extract after intraperitoneal administration, and no mortality of mice was after intragastric administration of extract at the dose of 10g/kg.<br>LD <sub>50</sub> for the chloroform fraction 350mg/kg (intraperitoneal) and 2.600mg/kg (intragastric),<br>LD <sub>50</sub> =420mg/kg (intraperitoneal) and LD <sub>50</sub> =5.100mg/kg (intragastric) for hexane fraction. |
| <b>Radioprotective</b> <i>in vivo</i> , mice irradiated with γ-irradiation [24]                                                                                                                                    | Aerial parts, combination with <i>Archangelica officinalis</i> extracts                                                 | 100% of animals survived after a dose of 6Gy (LD <sub>50</sub> /30); 70% survived after a dose of 7.5Gy (LD <sub>90</sub> /30), and 25% after a dose of 8Gy (LD <sub>100</sub> /12) by 30 day.                                                                                                                                                                                                                                |
| <b>Radioprotective</b> <i>in vivo</i> , 30 days albino mongrel male mice irradiated with γ-irradiation (LD <sub>90/30</sub> ) [25]                                                                                 | Aerial parts, combination with <i>Archangelica officinalis</i> extracts                                                 | Number of mouse pups was 10.2±0.6 in experimental and 7.4±0.7 in non-irradiated groups. The number of both sexes in the posterity of non-irradiated parents was equal; the number of female pups was 2.3 times larger than that of males.                                                                                                                                                                                     |

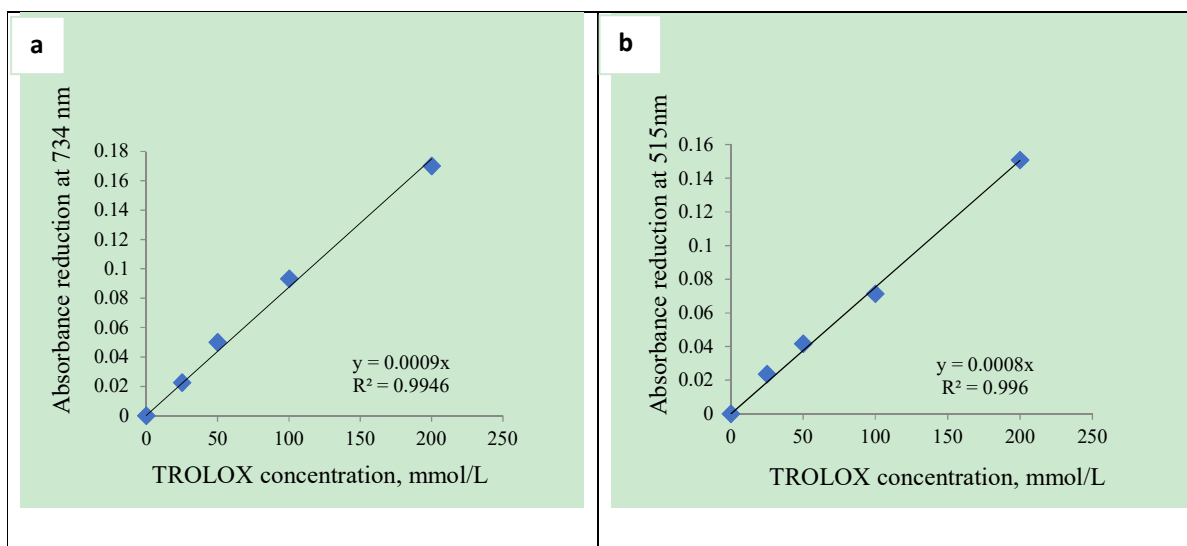

**Figure S2.** TROLOX standard calibration curves: (a) ABTS<sup>•+</sup> assay; (b) DPPH<sup>•</sup> assay.

## References

1. Jaenson, T.G.T.; Pålsson, K.; Borg-Karlson, A.-K. Evaluation of extracts and oils of tick-repellent plants from Sweden. *Med. Vet. Entomol.* **2005**, *19*, 345–352.
2. Jaenson, T.G.T.; Pålsson, K.; Borg-Karlson, A.-K. Evaluation of extracts and oils of mosquito (Diptera: *Culicidae*) repellent plants from Sweden and Guinea-Bissau. *J. Med. Entomol.* **2006**, *43*, 113–119.
3. Kuusik, A.; Harak, M.; Hiiesaar, K.; Metspalu, L.; Tartes, U. Studies on insect growth regulating (IGR) and toxic effects of *Ledum palustre* extracts on *Tenebrio molitor* pupae (Coleoptera, Tenebrionidae) using calorimetric recordings. *Termochim. Acta* **1995**, *251*, 247–253.
4. Egigu, M.C.; Ibrahim, M.A.; Yahya, A.; Holopainen, J.K. *Cordeauxia edulis* and *Rhododendron tomentosum* extracts disturb orientation and feeding behavior of *Hylobius abietis* and *Phyllodecta laticollis*. *Entomol. Exp. Appl.* **2011**, *138*, 162–174.
5. Himanen, S.J.; Bui, Th.N.T.; Mengistu, M.M.; Holopainen, J.K. Utilizing associational resistance for biocontrol: Impacted by temperature, supported by indirect defense. *BMC Ecol.* **2015**, *15*, 1–12.
6. Petrov, K.A. The effect of essential oils of *Ledum palustre* L., *Acorus calamus* L., *Artemisia jacutica* Drob. on the biotests growth. *Rast. Resursy* **1998**, *34*, 47–50. (In Russian)
7. Min, Z.; Jing-jing, Z.; Wen-bin, W.; Yun, Z.; Xing-lei, Z.; Wei-jing, Q. Analgesic and anti-inflammatory activities of extracts from *Ledum palustre* L. in mice. *Nat. Prod. Res. Dev.* **2010**, *22*, 326–329.
8. Belousov, M.V.; Saratikov, A.S.; Akhmedzhanov, R.R.; Berezovskaya, T.A.; Yusubov, M.S.; Dmitruk, S.E.; Basova, E.V. Pharmacological properties of *Ledum palustre* (Ericaceae) from Tomsk region. *Rast. Resursy* **2006**, *42*, 130–140. (In Russian)
9. Goun, E.A.; Petrichenko, V.M.; Solodnikov, S.U.; Suhinina, T.V.; Kline, M.A.; Cunningham, G.; Nguyen, C.; Miles, H. Anticancer and antithrombin activity of Russian plants. *J. Ethnopharm.* **2002**, *81*, 337–342.
10. Spiridonov, N.A.; Konovalov, D.A.; Arkhipov, V.V. Cytotoxicity of some Russian ethnomedicinal plants and plant compounds. *Phytother. Res.* **2005**, *19*, 428–432.
11. Harbilas, D.; Martineau, L.C.; Harris, C.S.; Adeyiwola-Spoor, D.C.; Saleem, A.; Lambert, J.; Caves, D.; Johns, T.; Prentki, M.; Cuerrier, A.; et al. Evaluation of the antidiabetic potential of selected medicinal plant extracts from the Canadian boreal forest used to treat symptoms of diabetes: Part II. *Can. J. Physiol. Pharm.* **2009**, *8*, 479–492.
12. Nistor Baldea, L.A.; Martineau, L.C.; Benhaddou-Andaloussi, A.; Arnason, J.T.; Lévy, É.; Haddad, P.S. Inhibition of intestinal glucose absorption by anti-diabetic medicinal plants derived from the James Bay Cree traditional pharmacopeia. *J. Ethnopharmacol.* **2010**, *132*, 473–482.
13. Belousova, N.I.; Dmitruk, S.E.; Khan, V.A. Antifungal properties of essential oils of *Ledum* L. *Khim. Farm. Zh.* **1989**, *23*, 317–319.
14. Jin, C.; Strembiski, W.; Kulchytska, Y.; Micetich, R.G.; Daneshlab, M. Flavonoid glycosides from *Ledum palustre* subsp. *decumbens*. *Daru* **1999**, *7*, 5–8.

15. Baananou, S.; Bagdonaite, E.; Marongiu, B.; Piras, A.; Porcedda, S.; Falconieri, D.; Boughattas, N.A. Supercritical CO<sub>2</sub> extract and essential oil of aerial part of *Ledum palustre* L.–Chemical composition and anti-inflammatory activity. *Nat. Prod. Res.* **2015**, *29*, 999–1005.
16. Wagner, H.; Wierer, M.; Bauer, R. In vitro Hemmung der Prostaglandin-Biosynthese durch etherische Ole und phenolische Verbindungen. *Planta Med.* **1986**, *3*, 184–187.
17. Tunón, H.; Olavsdotter, C.; Bohlin, L. Evaluation of anti-inflammatory activity of some Swedish medicinal plants. Inhibition of prostaglandin biosynthesis and PAF-induced exocytosis. *J. Ethnopharmacol.* **1995**, *48*, 61–76.
18. Kim, D.; Nam, B. Extracts and essential oil of *Ledum palustre* L. and their antioxidant and antimicrobial activities. *J. Food Sci. Nutr.* **2006**, *11*, 100–104.
19. Zhang, L. Chemical composition and antibacterial activity of the essential oil from Chinese wild *Ledum palustre* L. on *Vibrio Parahaemolyticus*. *Int. J. Food Nutr. Sci.* **2017**, *4*, 8–12.
20. Jesionek, A.; Kokońkiewicz, A.; Mikosik-Roczynska, A.; Ciesielska-Figlon, K.; Luczkiewicz, P.; Bucinski, A.; Dąca, A.; Witkowski, J.M.; Bryl, E.; Zabiegała, B.; et al. Chemical variability of *Rhododendron tomentosum* (*Ledum palustre*) essential oils and their pro-apoptotic effect on lymphocytes and rheumatoid arthritis synoviocytes. *Fitoterapia* **2019**, *139*, 104402.
21. Spiridonov, N.A.; Konovalov, D.A.; Arkhipov, V.V. Cytotoxicity of some Russian ethnomedicinal plants and plant compounds. *Phytother. Res.* **2005**, *19*, 428–432.
22. Belousov, M.V.; Saratikov, A.S.; Tshichalin, V.S.; Akhmedganov, R.R.; Berezovskaya, T.P.; Basova, E.V.; Yusubov, M.S. Hepatoprotective properties of *Ledum palustre* (Ericaceae) shoots dry extract. *Rast. Resursy* **2007**, *43*, 126–129.
23. Basova, E.V. Chemical and Pharmacological Study of Wild Rosemary. Ph.D. Thesis, Tomsk State University, Tomsk, Russia, 2004.
24. Narimanov, A.A. Reproductive capacity of male mice protected from supralethal effect of gamma-radiation by the administration of a mixture of extracts from *Archangelica officinalis* and *Ledum palustre*. *Radiobiologia* **1992**, *32*, 271–275.
25. Narimanov, A.A.; Myakisheva, S.N.; Kuznetsova, S.M. The radioprotective effect of *Archangelica officinalis* Hoffm. and *Ledum palustre* L. extracts on mice. *Radiobiologia* **1991**, *31*, 391–393.
